# Supplementary material for: Novel nonplanar and rigid fluorophores with intensive emission in water and the application in two-photon imaging of live cells
Source: Royal Society of Chemistry journal article supplement (doi:10.1039/c6ra13226j), 2016-01-01
Supplement: c6ra13226j1.pdf [file c6ra13226j1.pdf]

## **Supporting Information**

### Novel nonplanar and rigid fluorophores with intensive emission in water and the application in two-photon imaging of live cells

Jingwen Zhang,<sup>a</sup> Chao Wang,<sup>b</sup> Lei Zhang,<sup>a</sup> Huijing Wu,<sup>a</sup> Yi Xiao,<sup>\*,b</sup> Yufang Xu,<sup>a</sup> Xuhong Qian<sup>a</sup> and Weiping Zhu<sup>\*,a</sup>

a. State Key Laboratory of Bioreactor Engineering, Shanghai Key Laboratory of Chemical Biology, School of Pharmacy, East China University of Science and Technology, 130 Meilong Road, Shanghai 200237, China. E-mail: wpzhu@ecust.edu.cn

b. State Key Laboratory of Fine Chemicals, Dalian University of Technology, Dalian 116024, China. E-mail: xiaoyi@dlut.edu.cn

#### **Contents**

1. Materials and instruments
2. Synthesis and characterization
3. X-ray crystal structure determination of **FM2**
4. Photophysical properties
5. Cell imaging
6. NMR and HRMS spectra
7. References

## 1. Materials and Instruments

All solvents (AR, analytical reagent grade) are commercially available and were used without further purification.  $^1\text{H}$  NMR spectra and  $^{13}\text{C}$  NMR spectra were recorded in  $\text{CDCl}_3$ ,  $\text{CD}_3\text{OD}$  and  $\text{DMSO-}d_6$ ; TMS as internal standard at 25 °C on a Bruker AV-400 spectrometer. pH titration was carried out by using a pH-Meter PB-10. All reactions were monitored by thin-layer chromatography (TLC) using UV-light (254 nm) and Flu-light (365nm). Mass spectra Electro spray ionization (ESI) mass spectrometry was carried out in a HP 1100 LC-MS spectrometer. Deionized water was prepared with a Millipore Milli-Q A10 super-water system. Silica gel (300–400 mesh, Qingdao Haiyang Chemical Co., Ltd.) was used for column chromatography. All reagents were obtained commercially and used without further purification unless stated otherwise.

Bioassay: MCF-7 (human breast carcinoma) cells were obtained from Institute of Basic Medical Sciences (IBMS) of Chinese Academy of Medical Sciences (CAMS). Fluorescence imaging was acquired on an Olympus FV1000 confocal microscope.

## 2. Synthesis and characterization

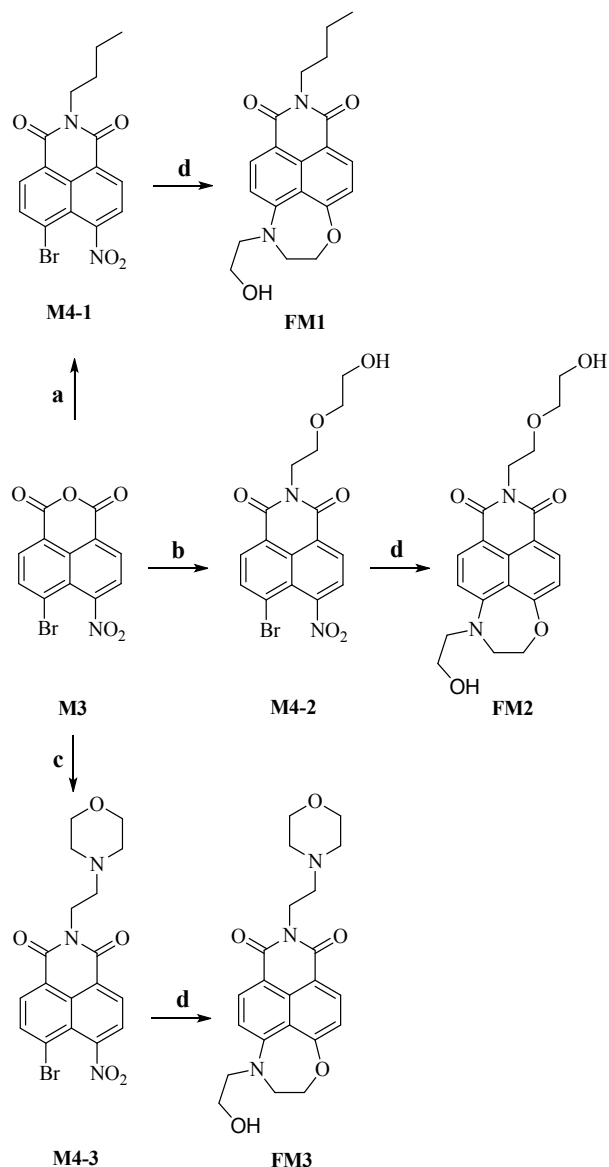

**Scheme S1.** Synthetic routes toward compound **FM1**, **FM2**, and **FM3**. (a) n-butylamine, ethanol, reflux, 2 h; (b) 2-(2-aminoethoxy)ethanol, ethanol, reflux, 2 h; (c) 2-morpholinoethanamine, ethanol, reflux, 2 h; (d) diethanolamine, CH<sub>3</sub>OCH<sub>2</sub>CH<sub>2</sub>OH, reflux, 7 h.

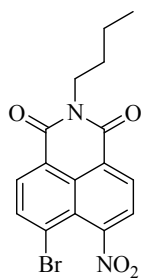

### **6-Bromo-2-butyl-7-nitro-1H-benzo[de]isoquinoline-1,3(2H)-dione (M4-1)<sup>1</sup>**

To a solution of compound **M3** (100 mg, 0.31 mmol) in ethanol (10 mL) was added n-butylamine (23 mg, 0.31 mmol) dissolved in 5 mL ethanol dropwise under 50 °C. Then the reaction was stirred under reflux for 2 h. After that, the mixture was evaporated in vacuum to get residue, which was purified successively by silica gel column chromatography (DCM/MeOH = 200/1, v/v) and recrystallization in ethanol to give pale yellow solid **M4-1** (51 mg, yield: 49%). Melting point: 175.4-176.2 °C.

$^1\text{H}$  NMR (400 MHz, DMSO- $d_6$ ):  $\delta$  8.63 (d,  $J$  = 8.0 Hz, 1H), 8.44 (d,  $J$  = 8.0 Hz, 1H), 8.40 (d,  $J$  = 6.8 Hz, 1H), 8.39 (d,  $J$  = 7.6 Hz, 1H), 4.03 (t,  $J$  = 7.6 Hz, 2H), 1.66-1.59 (m, 2H), 1.41-1.32 (m, 2H), 0.92 (t,  $J$  = 7.6 Hz, 3H). HRMS (EI) calcd for  $\text{C}_{16}\text{H}_{13}\text{N}_2\text{O}_4\text{Br}$   $[\text{M}]^+$ : 378.0038; found: 378.0042.

**8-Butyl-4-(2-hydroxyethyl)-3,4-dihydropyrido[3',4',5':4,5]naphtho[1,8-ef][1,4]oxazepine-7,9(2H,8H)-dione (FM1)**

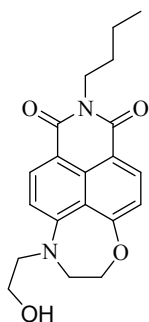

Compound **M4-1** (377 mg, 1.00 mmol) and diethanolamine (1.70 mL, 17.7 mmol) were mixed in 3.5 mL 2-methoxyethanol and refluxed for 7 h. The resulting reaction was cooled down to room temperature and extracted with dichloromethane (30 mL  $\times$  3). The organic layers were collected, washed with saturated brine (30 mL) and dried with anhydrous  $\text{Na}_2\text{SO}_4$  and evaporated under vacuum to give residue. The remaining residue was separated by silica gel column chromatography (DCM/MeOH = 50/1, v/v) to yield orange solid **FM1** (103 mg, yield: 29%). Melting point: 175.4-175.5  $^\circ\text{C}$ .  $^1\text{H}$  NMR (400 MHz, DMSO- $d_6$ ):  $\delta$  8.33 (d,  $J$  = 6.4 Hz, 1H), 8.21 (d,  $J$  = 7.2 Hz, 1H), 7.10 (d,  $J$  = 6.4 Hz, 1H), 7.02 (d,  $J$  = 7.2 Hz, 1H), 4.96 (t,  $J$  = 4.0 Hz, 1H), 4.64 (t,  $J$  = 3.8 Hz, 2H), 3.99 (t,  $J$  = 6.0 Hz, 2H), 3.85 (t,  $J$  = 3.8 Hz, 2H), 3.78-3.74 (m, 4H), 1.60-1.54 (m, 2H), 1.36-1.28 (m, 2H), 0.91 (t,  $J$  = 6.0 Hz, 3H).  $^{13}\text{C}$  NMR (100 MHz, DMSO- $d_6$ ):  $\delta$  163.1, 162.8, 161.6, 153.7, 132.9, 132.9, 115.8, 115.2, 114.7, 109.4, 108.4, 73.8, 57.7, 55.3, 54.4, 38.8, 29.7, 19.8, 13.7. HRMS (ESI) calcd for  $\text{C}_{20}\text{H}_{22}\text{N}_2\text{O}_4$   $[\text{M}+\text{H}]^+$ : 355.1658; found: 355.1653.  $\text{C}_{20}\text{H}_{22}\text{N}_2\text{O}_4$  (354.40) calcd (%): C 67.78, H 6.26, N 7.90; found: C 67.73, H 6.15, N 7.92.

**6-Bromo-2-(2-(2-hydroxyethoxy)ethyl)-7-nitro-1H-benzo[de]isoquinoline-1,3(2H)-dione (M4-2)<sup>2</sup>**

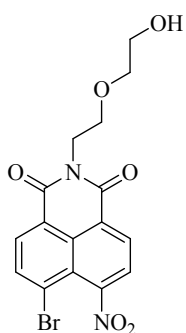

To a solution of compound **M3** (2.00 g, 6.2 mmol) in ethanol (50 mL) was added 2-(2-aminoethoxy)ethanol (616  $\mu\text{L}$ , 6.2 mmol) dissolved in 15 mL ethanol dropwise under 50  $^\circ\text{C}$ . Then the reaction was stirred under reflux for 2 h. After that, the mixture was evaporated in vacuum to get residue, which was purified by silica gel column chromatography (DCM/MeOH = 200/1, v/v) to give pale yellow solid **M4-2** (835 mg, yield: 33%). Melting point: 176.4-176.9  $^\circ\text{C}$ .  $^1\text{H}$  NMR (400 MHz,  $\text{CDCl}_3$ ):  $\delta$  8.71 (d,  $J$  = 4.0 Hz, 1H), 8.52 (d,  $J$  = 4.0 Hz, 1H), 8.21 (d,  $J$  = 4.0 Hz, 1H), 7.93 (d,  $J$  = 4.0 Hz, 1H), 4.44 (t,  $J$  = 5.6 Hz, 2H), 3.86 (t,  $J$  = 5.6 Hz, 2H), 3.67-3.69 (m, 2H), 3.63-3.65 (m, 2H), 2.08 (s, 1H). HRMS (ESI) calcd for  $\text{C}_{16}\text{H}_{14}\text{N}_2\text{O}_6\text{Br}$   $[\text{M}+\text{H}]^+$ : 409.0035; found: 409.0029.

**8-(2-(2-Hydroxyethoxy)ethyl)-4-(2-hydroxyethyl)-3,4-dihydropyrido[3',4',5':4,5]naphtho[1,8-ef][1,4]oxazepine-7,9(2H,8H)-dione (FM2)**

Compound **M4-2** (200 mg, 0.488 mmol) and diethanolamine (472  $\mu\text{L}$ , 4.88 mmol) were mixed in 3.5 mL of 2-methoxyethanol and refluxed for 7 h. The resulting reaction was cooled down to room temperature and extracted with dichloromethane (30 mL  $\times$  3). The organic layers were collected, washed with saturated brine (30 mL) and dried with anhydrous  $\text{Na}_2\text{SO}_4$  and

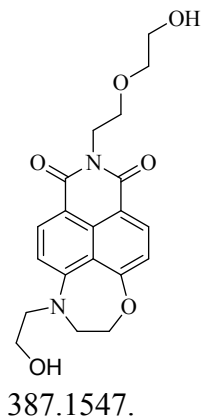

evaporated under vacuum to give residue. The remaining residue was separated by silica gel column chromatography (DCM/MeOH = 100/1, v/v) to yield orange solid **FM2** (102 mg, yield: 54%). Melting point: 108.4-109.0 °C. <sup>1</sup>H NMR (400 MHz, CDCl<sub>3</sub>): δ 8.48 (d, *J* = 8.4 Hz, 1H), 8.39 (d, *J* = 8.8 Hz, 1H), 7.12 (d, *J* = 8.0 Hz, 1H), 6.88 (d, *J* = 8.8 Hz, 1H), 4.65 (t, *J* = 5.0 Hz, 2H), 4.41 (t, *J* = 5.6 Hz, 2H), 4.02 (t, *J* = 5.2 Hz, 2H), 3.81-3.85 (m, 6H), 3.67-3.69 (m, 4H). <sup>13</sup>C NMR (100 MHz, CDCl<sub>3</sub>-CD<sub>3</sub>OD): δ 164.7, 164.6, 161.8, 153.9, 133.8, 133.7, 133.3, 116.6, 115.9, 115.8, 110.8, 108.6, 73.7, 72.4, 68.6, 61.4, 58.8, 55.6, 55.2, 39.4. HRMS (ESI) calcd for C<sub>20</sub>H<sub>23</sub>N<sub>2</sub>O<sub>6</sub> [M+H]<sup>+</sup>: 387.1556; found:

#### 6-Bromo-2-(2-morpholinoethyl)-7-nitro-1H-benzo[de]isoquinoline-1,3(2H)-dione (**M4-3**)

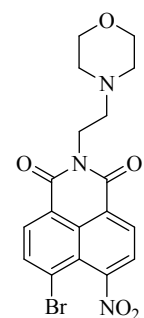

To a solution of compound **M3** (2.00 g, 6.21 mmol) in ethanol (50 mL) was added 2-morpholinoethanamine (808 mg, 6.21 mmol) dissolved in 15 mL ethanol dropwise under 50 °C. Then the reaction was stirred under reflux for 2 h. After that, the mixture was evaporated in vacuum to get residue, which was purified by silica gel column chromatography (DCM/MeOH = 200/1, v/v) to give pale yellow solid **M4-3** (1.05 g, yield: 39%). Melting point: 200.7-201.1 °C. <sup>1</sup>H NMR (400 MHz, CDCl<sub>3</sub>): δ 8.70 (d, *J* = 7.6 Hz, 1H), 8.51 (d, *J* = 8.0 Hz, 1H), 8.22 (d, *J* = 8.0 Hz, 1H), 7.93 (d, *J* = 7.6 Hz, 1H), 4.33 (t, *J* = 6.2 Hz, 2H), 3.65 (br, 4H), 2.70 (t, *J* = 6.2 Hz, 2H), 2.57 (br, 4H). <sup>13</sup>C NMR (100 MHz, CDCl<sub>3</sub>): δ 162.8, 162.1, 151.3, 136.0, 132.3, 131.2, 130.6, 125.7, 124.2, 123.6, 122.4, 121.2, 67.0, 55.9, 53.8, 37.7. HRMS (ESI) calcd for C<sub>18</sub>H<sub>17</sub>N<sub>3</sub>O<sub>5</sub>Br [M+H]<sup>+</sup>: 434.0352; found: 434.0344.

#### 4-(2-Hydroxyethyl)-8-(2-morpholinoethyl)-3,4-dihydropyrido[3',4':5',4,5]naphtho[1,8-*eff*][1,4]oxazepine-7,9(2H,8H)-dione (**FM3**)

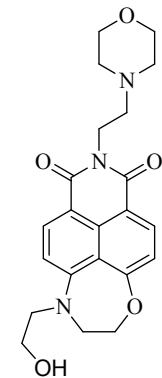

Compound **M4-3** (100 mg, 0.230 mmol) and diethanolamine (221 μL, 2.30 mmol) were mixed in 2.5 mL 2-methoxyethanol and refluxed for 7 h. The resulting reaction was cooled down to room temperature and extracted with dichloromethane (20 mL × 3). The organic layers were collected, washed with saturated brine (20 mL) and dried with anhydrous Na<sub>2</sub>SO<sub>4</sub> and evaporated under vacuum to give residue. The remaining residue was separated by silica gel column chromatography (DCM/MeOH = 100/1, v/v) to yield orange solid **FM3** (56 mg, yield: 59%). Melting point: 213.2-215.7 °C. <sup>1</sup>H NMR (400 MHz, DMSO-*d*<sub>6</sub>): δ 8.33 (d, *J* = 8.0 Hz, 1H), 8.20 (d, *J* = 8.8 Hz, 1H), 7.11 (d, *J* = 8.0 Hz, 1H), 7.02 (d, *J* = 8.8 Hz, 1H), 4.98 (br, 1H), 4.65 (t, *J* = 4.6 Hz, 2H), 4.13 (t, *J* = 7.0 Hz, 2H), 3.85 (t, *J* = 4.6 Hz, 2H), 3.75 (br, 4H), 3.53 (br, 4H), 2.54-2.51 (m, 2H), 2.45 (bs, 4H). <sup>13</sup>C NMR (100 MHz, DMSO-*d*<sub>6</sub>): δ 163.1, 162.8, 161.6, 153.8, 132.9, 115.8, 115.1, 114.6, 109.3, 108.4, 73.8, 66.2, 57.7, 55.7, 55.3, 54.4, 53.4, 36.3. HRMS (ESI) calcd for C<sub>22</sub>H<sub>26</sub>N<sub>3</sub>O<sub>5</sub> [M+H]<sup>+</sup>: 412.1872; found: 412.1881.

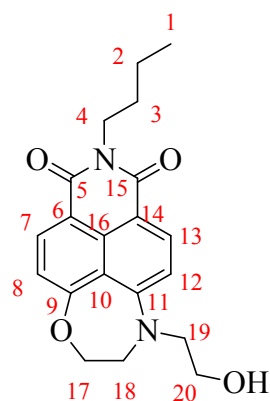

**FM1**

**Table S1.** 1D and 2D NMR data of compound **FM1** in DMSO-*d*<sub>6</sub>

| No. | <sup>1</sup> H <sup>a</sup> δ <sub>H</sub> , multi. ( <i>J</i> /Hz) | <sup>13</sup> C <sup>b</sup> δ <sub>C</sub> | COSY                            | HMQC            | HMBC                                                               | DEPT<br>135 | DEPT<br>90 |
|-----|---------------------------------------------------------------------|---------------------------------------------|---------------------------------|-----------------|--------------------------------------------------------------------|-------------|------------|
| 1   | 0.91, 3H, t (6.0)                                                   | 13.7                                        | H <sub>2</sub>                  | C <sub>1</sub>  | C <sub>1-3</sub>                                                   | +           |            |
| 2   | 1.28-1.36, 2H, m                                                    | 19.8                                        | H <sub>1</sub> , H <sub>3</sub> | C <sub>2</sub>  | C <sub>1-4</sub>                                                   | —           |            |
| 3   | 1.54-1.60, 2H, m                                                    | 29.7                                        | H <sub>2</sub> , H <sub>4</sub> | C <sub>3</sub>  | C <sub>1-4</sub>                                                   | —           |            |
| 4   | 3.99, 2H, t (6.0)                                                   | 38.8                                        | H <sub>3</sub>                  | C <sub>4</sub>  | C <sub>2</sub> , C <sub>3</sub><br>C <sub>5</sub> /C <sub>15</sub> | —           |            |
| 5   |                                                                     | 163.1                                       |                                 |                 |                                                                    |             |            |
| 6   |                                                                     | 114.7                                       |                                 |                 |                                                                    |             |            |
| 7   | 8.33, 1H, d (6.4)                                                   | 132.9                                       | H <sub>8</sub>                  | C <sub>7</sub>  | C <sub>7</sub> , C <sub>9</sub>                                    | +           | +          |
| 8   | 7.10, 1H, d (6.4)                                                   | 115.8                                       | H <sub>7</sub>                  | C <sub>8</sub>  | C <sub>9</sub> , C <sub>16</sub>                                   | +           | +          |
| 9   |                                                                     | 161.6                                       |                                 |                 |                                                                    |             |            |
| 10  |                                                                     | 109.4                                       |                                 |                 |                                                                    |             |            |
| 11  |                                                                     | 153.7                                       |                                 |                 |                                                                    |             |            |
| 12  | 7.02, 1H, d (7.2)                                                   | 108.4                                       | H <sub>13</sub>                 | C <sub>12</sub> | C <sub>10</sub> , C <sub>14</sub>                                  | +           | +          |
| 13  | 8.21, 1H, d (7.2)                                                   | 132.9                                       | H <sub>12</sub>                 | C <sub>13</sub> | C <sub>11-13</sub> , C <sub>15</sub>                               | +           | +          |
| 14  |                                                                     | 114.7                                       |                                 |                 |                                                                    |             |            |
| 15  |                                                                     | 162.8                                       |                                 |                 |                                                                    |             |            |
| 16  |                                                                     | 115.2                                       |                                 |                 |                                                                    |             |            |
| 17  | 4.64, 2H, t (3.8)                                                   | 73.8                                        | H <sub>18</sub>                 | C <sub>17</sub> | C <sub>9</sub>                                                     | —           |            |
| 18  | 3.85, 2H, t (3.8)                                                   | 54.4                                        | H <sub>17</sub>                 | C <sub>18</sub> | C <sub>11</sub>                                                    | —           |            |
| 19  |                                                                     | 57.7                                        |                                 | C <sub>19</sub> | C <sub>11</sub> , C <sub>20</sub>                                  | —           |            |
| 20  | 3.74-3.78, 4H, m                                                    | 55.3                                        | OH                              | C <sub>20</sub> | C <sub>19</sub>                                                    | —           |            |
| OH  | 4.96, 1H, t (4.0)                                                   |                                             | H <sub>20</sub>                 |                 |                                                                    |             |            |

<sup>a</sup> recorded at 400 MHz, <sup>b</sup> recorded at 100 MHz

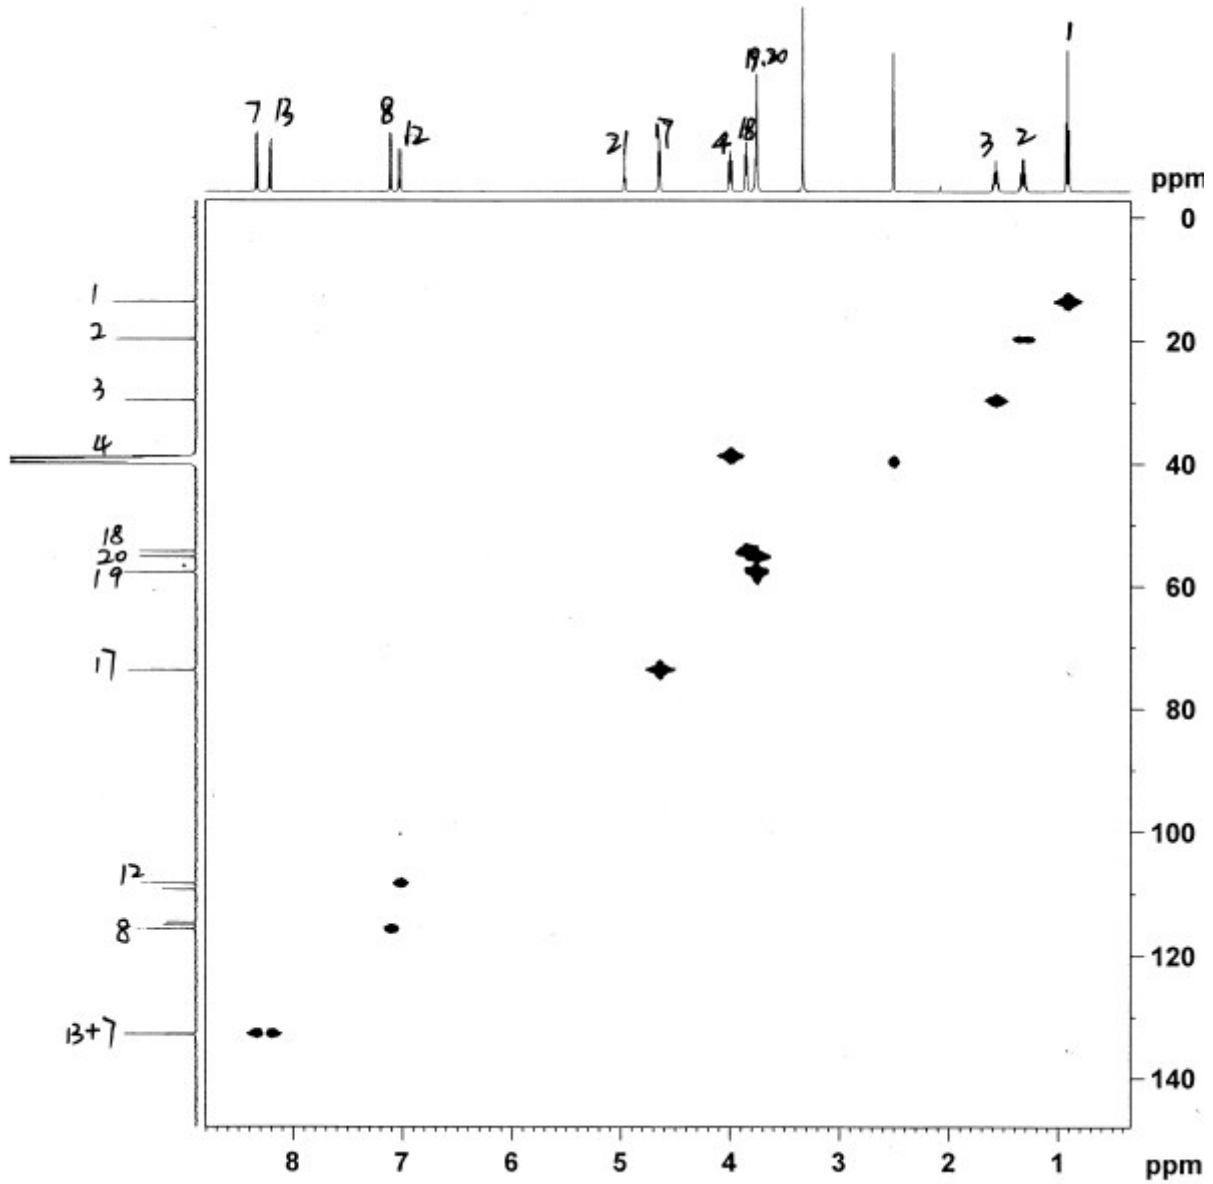

Fig. S1. HMQC spectrum of FM1 (DMSO-*d*<sub>6</sub>)

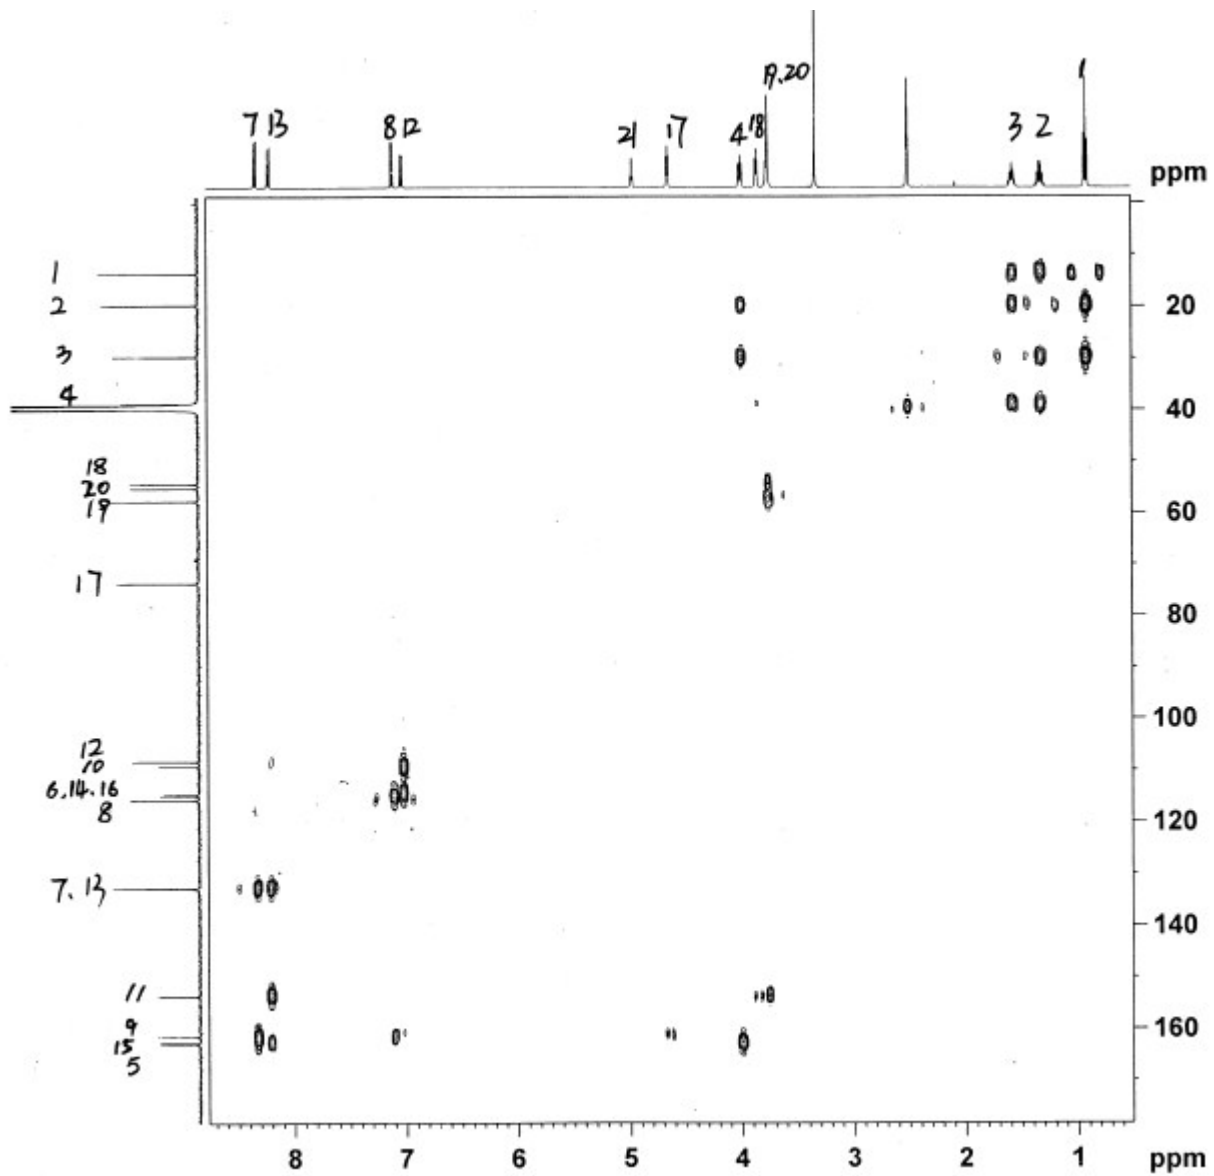

Fig. S2. HMBC spectrum of FM1 (DMSO-*d*<sub>6</sub>)



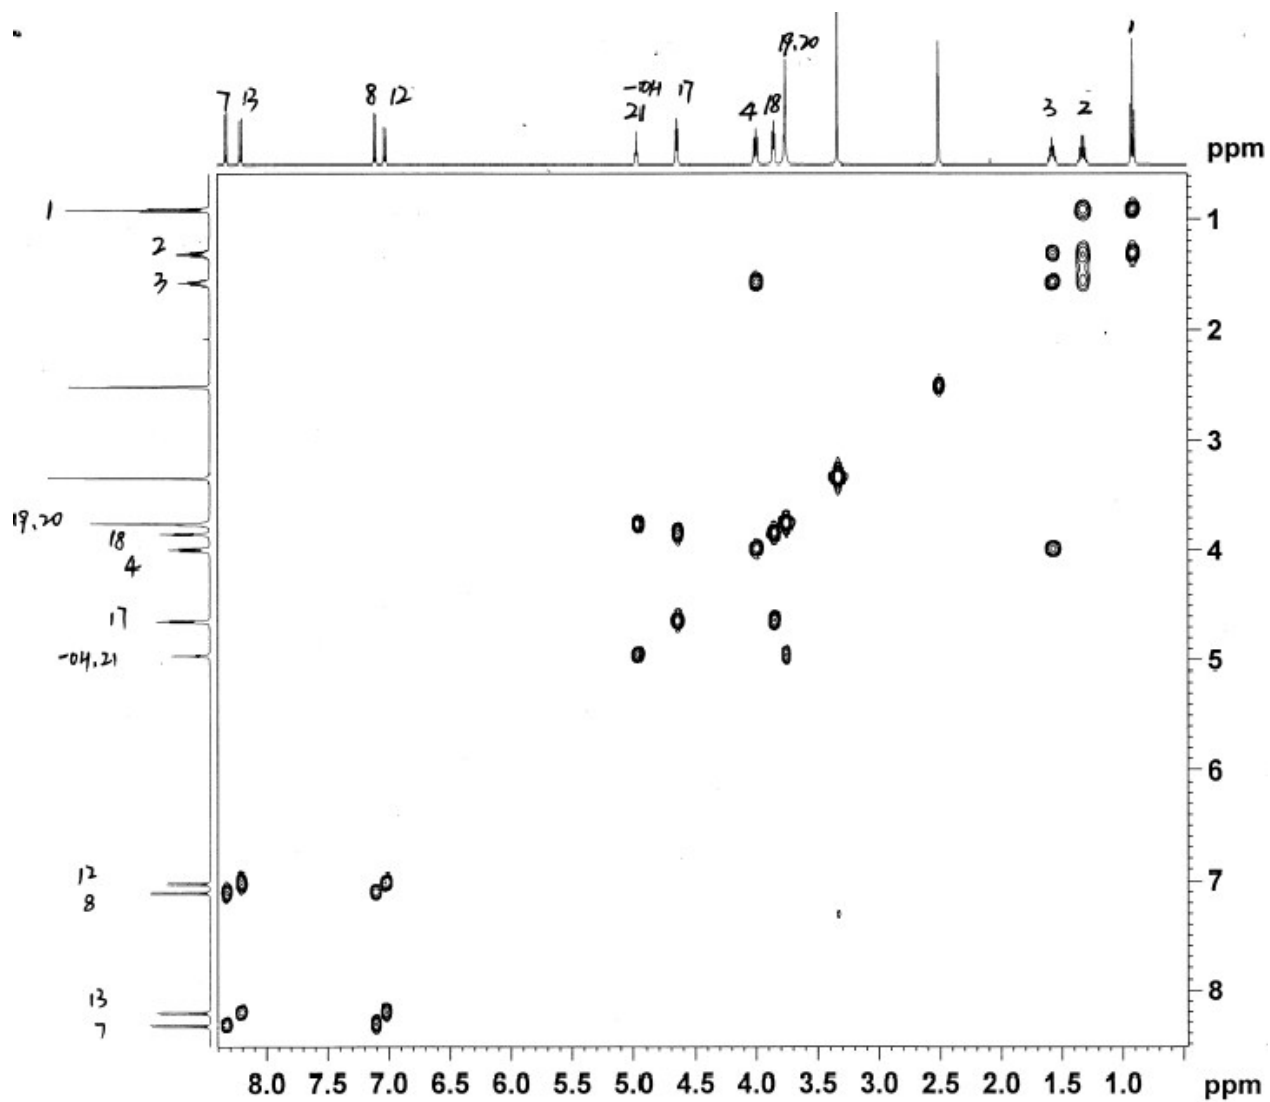

Fig. S3.  $^1\text{H}$ - $^1\text{H}$  COSY spectrum of FM1 (DMSO- $d_6$ )

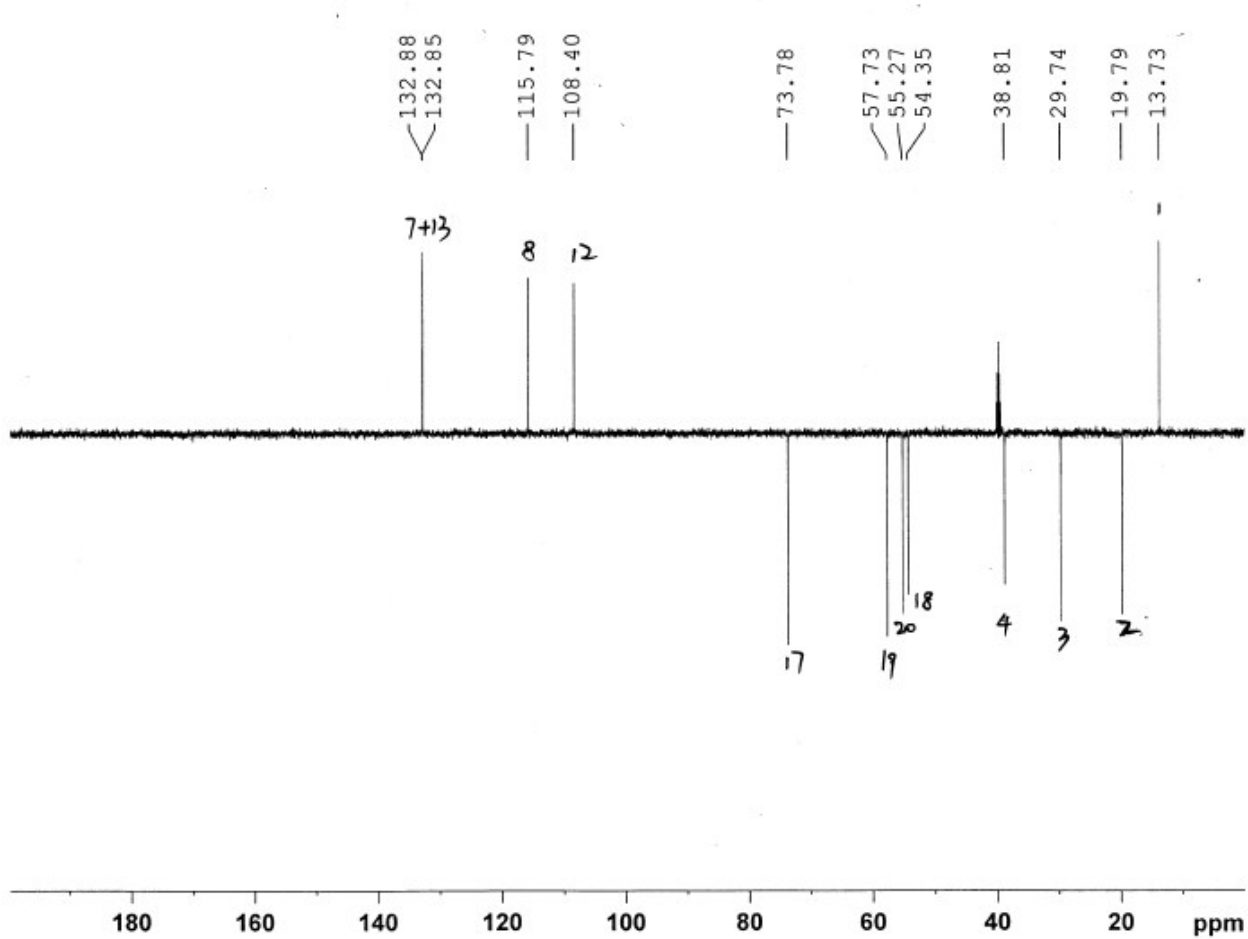

Fig. S4. DEPT 135 spectrum of FM1 (DMSO- $d_6$ )

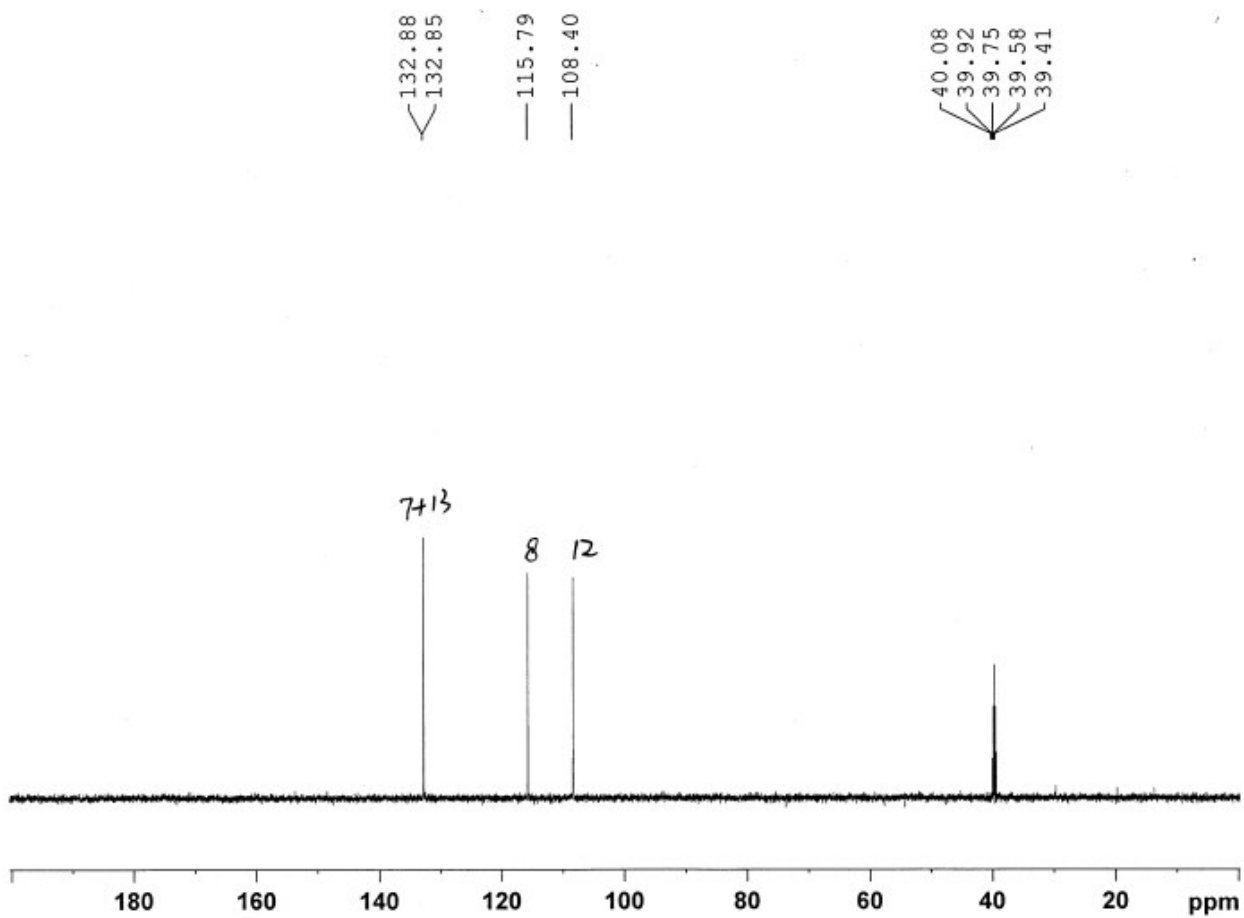

Fig. S5. DEPT 90 spectrum of FM1 (DMSO- $d_6$ )

### 3. X-ray crystal structure determination of FM2

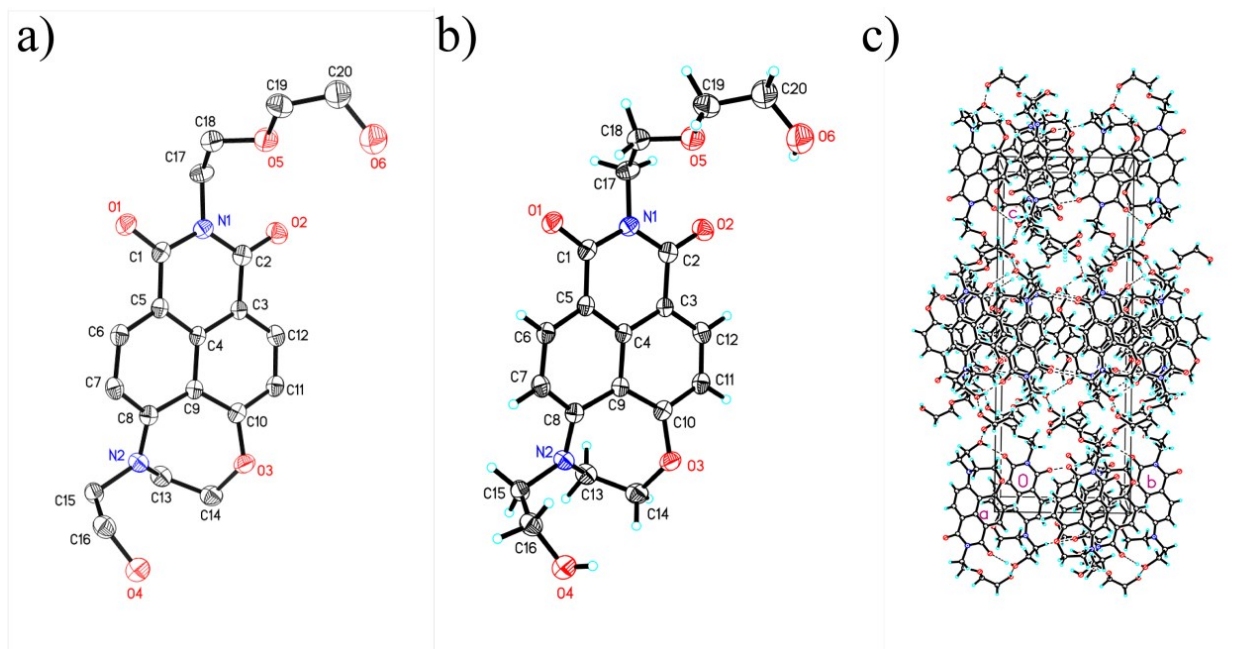

**Fig. S6.** Crystal structure of **FM2**. a) Thermal ellipsoid drawing of top view at 30% probability level, those unlabeled balls represent hydrogen atoms. b) Thermal ellipsoid drawing of top view at 30% probability level without hydrogen atoms. c) Packing structure along b-axis. Therein colour coding is as follows: C (gray), H (green), O (red), N (blue).

**Table S2.** Crystal data and structure refinement for **FM2**.

---

|                                   |                                                               |          |
|-----------------------------------|---------------------------------------------------------------|----------|
| Empirical formula                 | C <sub>20</sub> H <sub>22</sub> N <sub>2</sub> O <sub>6</sub> |          |
| Formula weight                    | 386.39                                                        |          |
| Temperature                       | 293(2) K                                                      |          |
| Wavelength                        | 0.71073 Å                                                     |          |
| Crystal system                    | Orthorhombic                                                  |          |
| Space group                       | P b c a                                                       |          |
| Unit cell dimensions              | a = 11.177(4) Å                                               | a = 90°. |
|                                   | b = 10.727(4) Å                                               | b = 90°. |
|                                   | c = 29.751(11) Å                                              | g = 90°. |
| Volume                            | 3567(2) Å <sup>3</sup>                                        |          |
| Z                                 | 8                                                             |          |
| Density (calculated)              | 1.439 Mg/m <sup>3</sup>                                       |          |
| Absorption coefficient            | 0.107 mm <sup>-1</sup>                                        |          |
| F(000)                            | 1632                                                          |          |
| Crystal size                      | 0.160 x 0.110 x 0.060 mm <sup>3</sup>                         |          |
| Theta range for data collection   | 2.279 to 24.998°.                                             |          |
| Index ranges                      | -13<=h<=13, -12<=k<=10, -35<=l<=32                            |          |
| Reflections collected             | 18539                                                         |          |
| Independent reflections           | 3143 [R(int) = 0.1857]                                        |          |
| Completeness to theta = 25.242°   | 97.4 %                                                        |          |
| Absorption correction             | Semi-empirical from equivalents                               |          |
| Max. and min. transmission        | 0.7456 and 0.6098                                             |          |
| Refinement method                 | Full-matrix least-squares on F <sup>2</sup>                   |          |
| Data / restraints / parameters    | 3143 / 0 / 256                                                |          |
| Goodness-of-fit on F <sup>2</sup> | 1.018                                                         |          |
| Final R indices [I>2sigma(I)]     | R1 = 0.0687, wR2 = 0.1290                                     |          |
| R indices (all data)              | R1 = 0.1455, wR2 = 0.1587                                     |          |
| Extinction coefficient            | 0.0042(14)                                                    |          |
| Largest diff. peak and hole       | 0.335 and -0.238 e.Å <sup>-3</sup>                            |          |

---

## 4. Photophysical properties

### 4.1 Absorption and emission spectra

Absorption and emission spectra were performed at identical condition (25 °C) with a Varian Cary 100 spectrometer and a Varian Cary Eclipse fluorescence spectrometer, respectively.

### 4.2 Fluorescence quantum yield

Fluorescein was utilized as a standard sample with known quantum yield ( $\Phi_s = 0.79$ ) in 0.1 M NaOH aqueous solution<sup>3</sup>. The relative fluorescence quantum yields were calculated according to the following equation<sup>432</sup>

$$\Phi_x = \Phi_s (Grad_x/Grad_s) (n_x^2/n_s^2)$$

Where the subscripts x and s represent test and standard respectively,  $\Phi$  means fluorescence quantum yield, *Grad* denotes the gradient from the plot of integrated fluorescence intensity vs absorbance, and *n* is the refractive index of the selected solvent.

All the final compounds **FM0**, **FM1**, **FM2**, and **FM3** were prepared into 1 mM DMSO stock solution for test. And Fluorescence quantum yields of each compound were measured in various solvents including deionized water, PBS buffer (0.01 M, pH = 7.4), Tris-HCl buffer (0.1 M, pH = 7.4), analytically pure ethanol, acetonitrile, tetrahydrofuran (**Table S3**). Fluorescence testing slit: 5/2.5 nm

### 4.3 pH titration

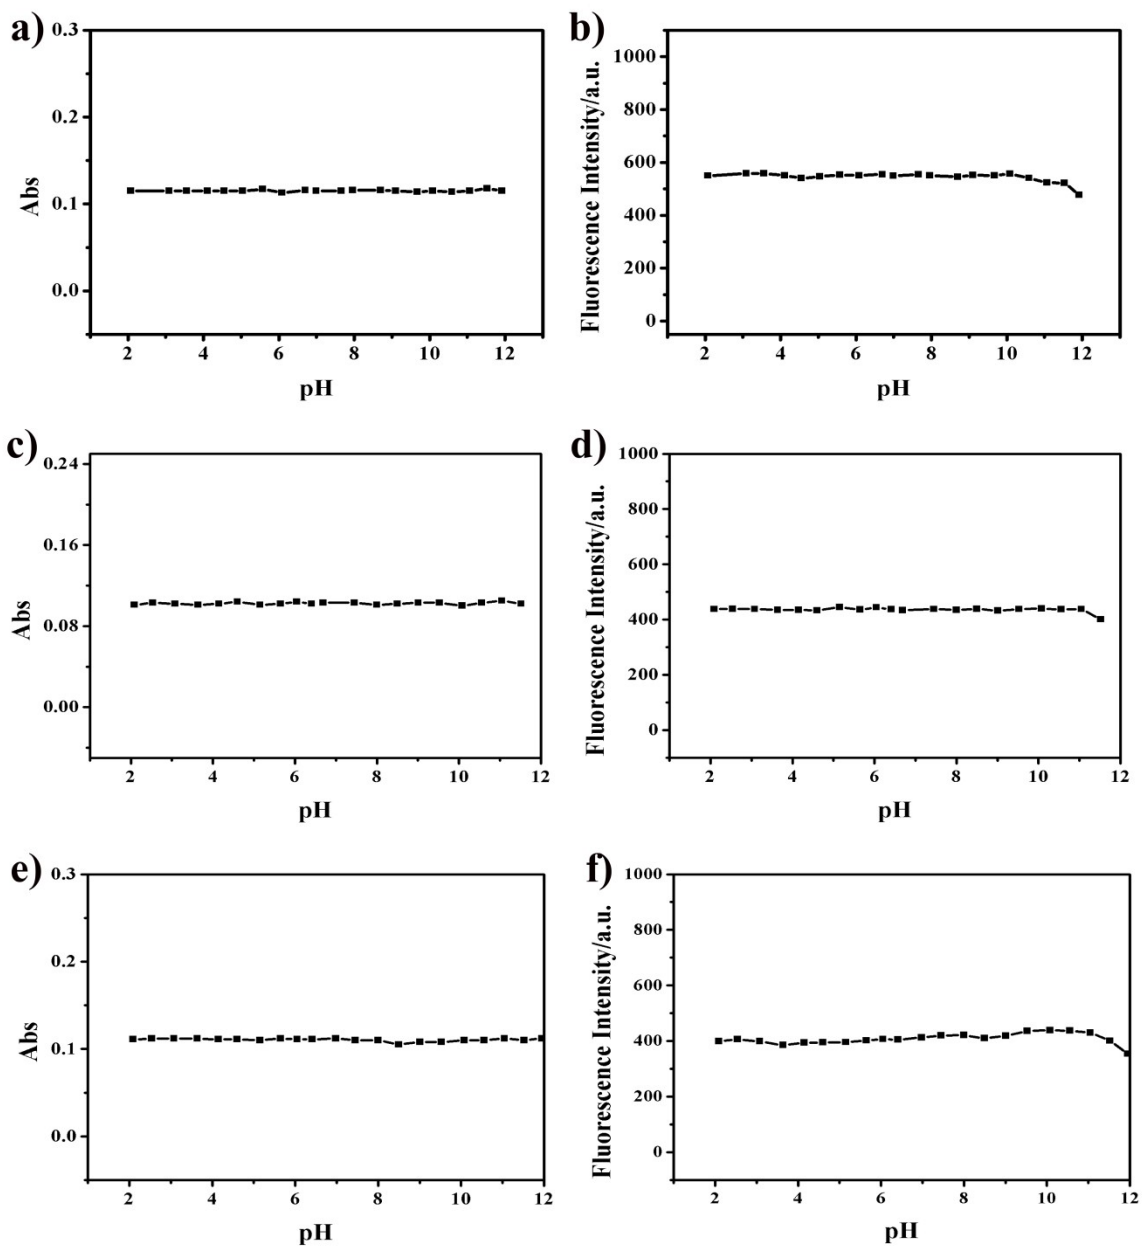

**Fig. S7.** Absorption (a, c, e) and emission (b, d, f) changes of **FM1**, **FM2**, **FM3** (5  $\mu\text{M}$ ) as a function of pH values ranging from 2 to 12 in Water (0.5% DMSO). Excitation wavelength: 470 nm, slit: 5/2.5 nm.

**Table S3.** Absorption and emission properties of **FM0**, **FM1**, **FM2**, and **FM3** in selected solvents.<sup>a</sup>

| compounds              | Solvent            | $\lambda_{\text{abs}}^{\text{max}}$<br>(nm) | $\lambda_{\text{em}}^{\text{max}}$ <sup>c</sup><br>(nm) | $\Delta\lambda$<br>(nm) | $\epsilon$<br>( $\times 10^4 \text{ M}^{-1} \text{ cm}^{-1}$ ) | $\Phi^{\text{d}}$ | Brightness <sup>e</sup><br>( $\times 10^4 \text{ M}^{-1} \text{ cm}^{-1}$ ) |
|------------------------|--------------------|---------------------------------------------|---------------------------------------------------------|-------------------------|----------------------------------------------------------------|-------------------|-----------------------------------------------------------------------------|
| <b>FM0<sup>b</sup></b> | CH <sub>3</sub> CN | 433                                         | 520                                                     | 87                      | 1.47                                                           | 0.82              | 1.21                                                                        |
|                        | EtOH               | 442                                         | 530                                                     | 88                      | 1.50                                                           | 0.86              | 1.29                                                                        |
|                        | THF                | 429                                         | 501                                                     | 72                      | 1.42                                                           | 0.86              | 1.22                                                                        |
|                        | <b>water</b>       | 455                                         | 542                                                     | 87                      | 1.11                                                           | <b>0.082</b>      | <b>0.09</b>                                                                 |
|                        | PBS                | 456                                         | 542                                                     | 86                      | 1.07                                                           | 0.083             | 0.09                                                                        |
|                        | Tris-HCl           | 460                                         | 548                                                     | 88                      | 1.12                                                           | 0.073             | 0.08                                                                        |
| <b>FM1</b>             | CH <sub>3</sub> CN | 442                                         | 500                                                     | 58                      | 1.99                                                           | 0.86              | 1.71                                                                        |
|                        | EtOH               | 450                                         | 502                                                     | 52                      | 1.94                                                           | 0.97              | 1.88                                                                        |
|                        | THF                | 437                                         | 488                                                     | 51                      | 1.98                                                           | 0.93              | 1.84                                                                        |
|                        | <b>water</b>       | 469                                         | 525                                                     | 56                      | 2.44                                                           | <b>0.62</b>       | <b>1.51</b>                                                                 |
|                        | PBS                | 467                                         | 525                                                     | 58                      | 2.18                                                           | 0.58              | 1.26                                                                        |
|                        | Tris-HCl           | 469                                         | 525                                                     | 56                      | 2.27                                                           | 0.59              | 1.34                                                                        |
| <b>FM2</b>             | CH <sub>3</sub> CN | 443                                         | 501                                                     | 58                      | 1.90                                                           | 0.85              | 1.62                                                                        |
|                        | EtOH               | 450                                         | 505                                                     | 55                      | 1.68                                                           | 0.92              | 1.55                                                                        |
|                        | THF                | 440                                         | 491                                                     | 51                      | 1.74                                                           | 0.91              | 1.58                                                                        |
|                        | <b>water</b>       | 467                                         | 527                                                     | 60                      | 2.05                                                           | <b>0.66</b>       | <b>1.35</b>                                                                 |
|                        | PBS                | 468                                         | 525                                                     | 57                      | 2.00                                                           | 0.64              | 1.28                                                                        |
|                        | Tris-HCl           | 468                                         | 525                                                     | 57                      | 2.36                                                           | 0.65              | 1.53                                                                        |
| <b>FM3</b>             | CH <sub>3</sub> CN | 441                                         | 498                                                     | 57                      | 1.79                                                           | 0.92              | 1.65                                                                        |
|                        | EtOH               | 453                                         | 502                                                     | 49                      | 1.98                                                           | 0.99              | 1.96                                                                        |
|                        | THF                | 437                                         | 486                                                     | 49                      | 1.78                                                           | 0.96              | 1.71                                                                        |
|                        | <b>water</b>       | 469                                         | 526                                                     | 57                      | 2.18                                                           | <b>0.60</b>       | <b>1.31</b>                                                                 |
|                        | PBS                | 467                                         | 528                                                     | 61                      | 2.11                                                           | 0.62              | 1.31                                                                        |
|                        | Tris-HCl           | 469                                         | 525                                                     | 56                      | 2.06                                                           | 0.60              | 1.24                                                                        |

<sup>a</sup> Stokes shifts,  $\Delta\lambda$ ; molar extinction coefficient at longest wavelength transition,  $\epsilon$ ; fluorescence quantum yields,  $\Phi$ .

<sup>b</sup> Control compound: N-butyl-4-butylamine-1,8-naphthalimide, usually used as reference ( $\Phi_{\text{s}} = 0.81$  in alcohol).

<sup>c</sup> Excited at maximum absorption wavelength.

<sup>d</sup> Determined relative to fluorescein ( $\Phi_{\text{f}} = 0.79$  in 0.1 M sodium hydroxide aqueous solution).

<sup>e</sup> Brightness was the product of the molar extinction coefficient at  $\lambda_{\text{abs}}^{\text{max}}$  and the corresponding fluorescence quantum yield.



#### 4.4 Photostability <sup>5</sup>

The photostability of **FM0**, **FM1**, **FM2**, and **FM3**, fluorescein and BODIPY were measured under irradiation of a 150 W Incandescent Lamp for 200 min. **FM0**: 10% DMSO (v/v) in water, exited at 455 nm, slit: 5/5 nm; **FM1**, **FM2**, and **FM3**: 0.5% DMSO (v/v) in water, exited at 470 nm, slit: 5/2.5 nm; fluorescein: 0.1M sodium hydroxide solution, exited at 480 nm, slit: 5/2.5 nm; BODIPY: 10% DMSO (v/v) in water, excited at 480 nm, slit: 5/2.5 nm. These six samples were 10 cm from the light source, between which was placed a transparent capacity full of saturated potassium nitrate solution. Therein, saturated salt solution was utilized to avoid influence from strong heat of lamp.

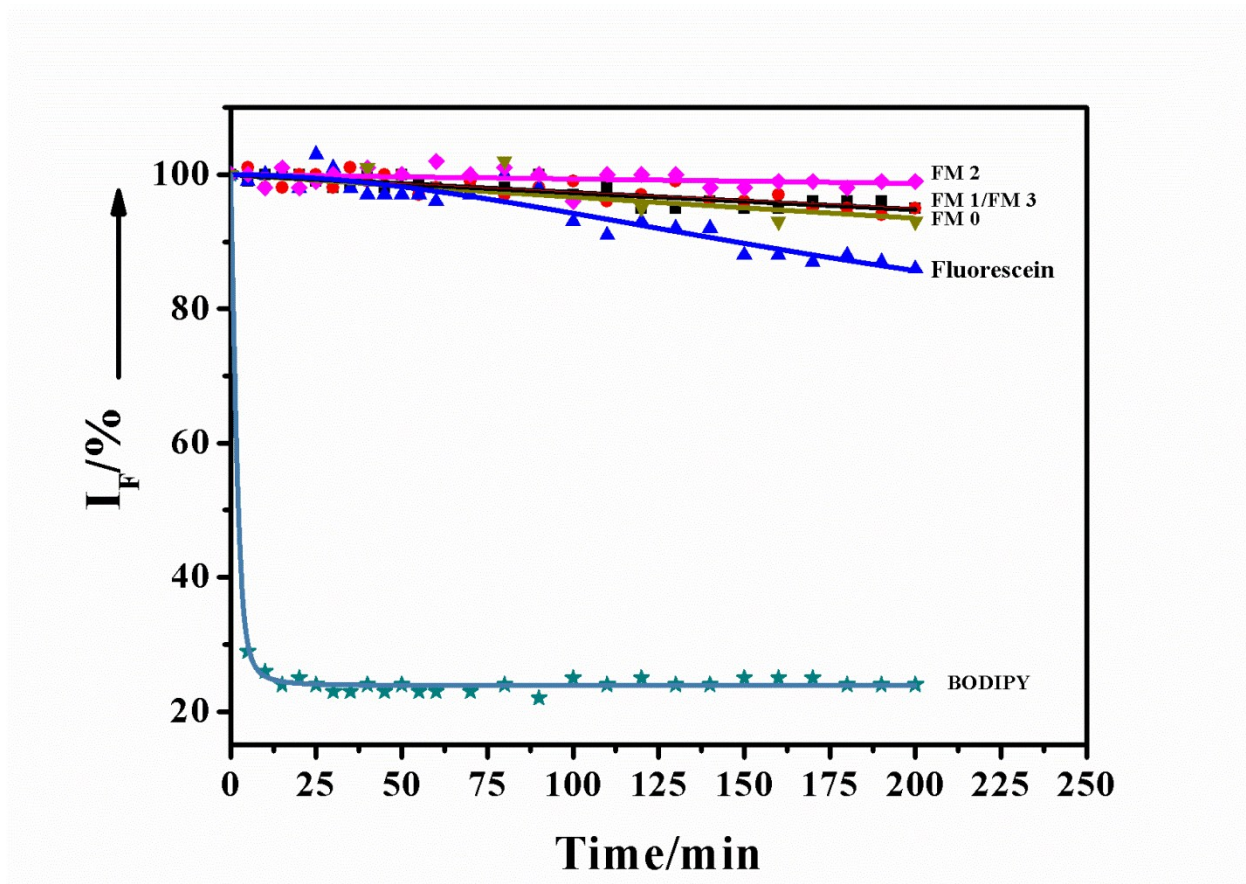

**Fig. S8.** Photobleaching curves for **FM0** (dark yellow), **FM1** (black), **FM2** (pink), **FM3** (red), Fluorescein (blue), BODIPY (cyan). The plot was obtained by using a 150 W Incandescent Lamp in water (10% DMSO, v/v) for **FM0** and BODIPY, water (0.5% DMSO, v/v) for **FM1**, **FM2**, and **FM3**, 0.1 M sodium hydroxide solution for fluorescein. BODIPY: 10-(4-carboxyphenyl)-5,5-difluoro-1,3,7,9-tetramethyl-5H-dipyrrolo [1,2-c:2',1'-f][1,3,2]diazaborinin-4-ium-5-uide.

## 5. Cell imaging

### 5.1 Two-photon action cross section

TPA spectra were measured through a femtosecond two-photon-excited fluorescence (TPEF) technique<sup>6</sup>.

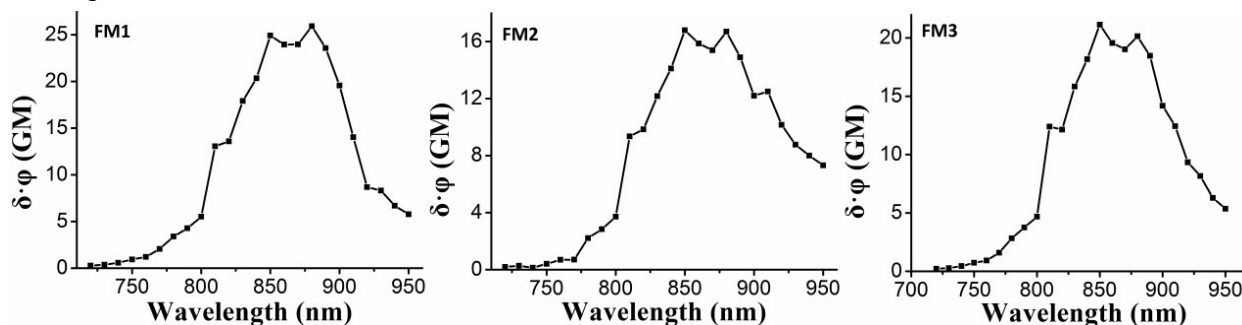

Fig. S9. Two-photon action ( $\delta \cdot \phi$ ) spectra of compounds **FM1**, **FM2**, and **FM3** in EtOH.

### 5.2 General methods

MCF-7 (human breast carcinoma) cells were obtained from Institute of Basic Medical Sciences (IBMS) of Chinese Academy of Medical Sciences (CAMS). Fluorescent imaging was acquired on an Olympus FV1000 confocal microscope.

### 5.3 Fluorescence imaging

The cells were cultured in Dulbecco's modified Eagle's medium (DMEM) medium supplemented with 10% FBS (fetal bovine serum) and Penicillin-Streptomycin at 37°C in 95% air with 5% CO<sub>2</sub>. Cells cultured in glass bottom dishes for 24 h and stained with **FM0** (2  $\mu$ M, 20 min), **FM1** (1  $\mu$ M, 10 min), **FM2** (2  $\mu$ M, 20 min) or **FM3** (2  $\mu$ M, 20 min). And then cells were washed with PBS for three times. **FM3** stained cells were incubated for more 20 min.

Table S4. The laser intensities and gain settings of compounds **FM0**, **FM1**, **FM2** and **FM3** in cell imaging experiment

| compound   | laser intensities |     | gain settings |       |
|------------|-------------------|-----|---------------|-------|
|            | OPM               | TPM | OPM           | TPM   |
| <b>FM0</b> | 2%                | 9%  | 600 V         | 700 V |
| <b>FM1</b> | 5%                | 12% | 600 V         | 700 V |
| <b>FM2</b> | 30%               | 36% | 700 V         | 700 V |
| <b>FM3</b> | 16%               | 20% | 650 V         | 680 V |

#### 5.4 MTT assay

MCF-7 cells in exponential phase of growth were used to assess the cytotoxic effect of **FM1**, **FM2**, and **FM3**.  $3 \times 10^3$  cells/well (100  $\mu\text{L}$ ) were seeded into 96-well plates and allowed to grow for 24 h prior to treatment with **FM1**, **FM2**, and **FM3**. **FM1**, **FM2**, and **FM3** at different concentrations (0, 1, 2, 10, 20  $\mu\text{M}$ , dispersed in 100  $\mu\text{L}$  medium) were added into wells (final concentration 0, 0.5, 1, 5, 10  $\mu\text{M}$ ) and incubated for 24 h. MTT is added (final concentration 0.5 mg/mL) and incubate for more 4 h. The medium was removed and 200  $\mu\text{L}$  DMSO was added to dissolve the formazan crystals. Optical densities were measured at 490 nm by a Thermo Scientific Multiskan FC spectrophotometer.

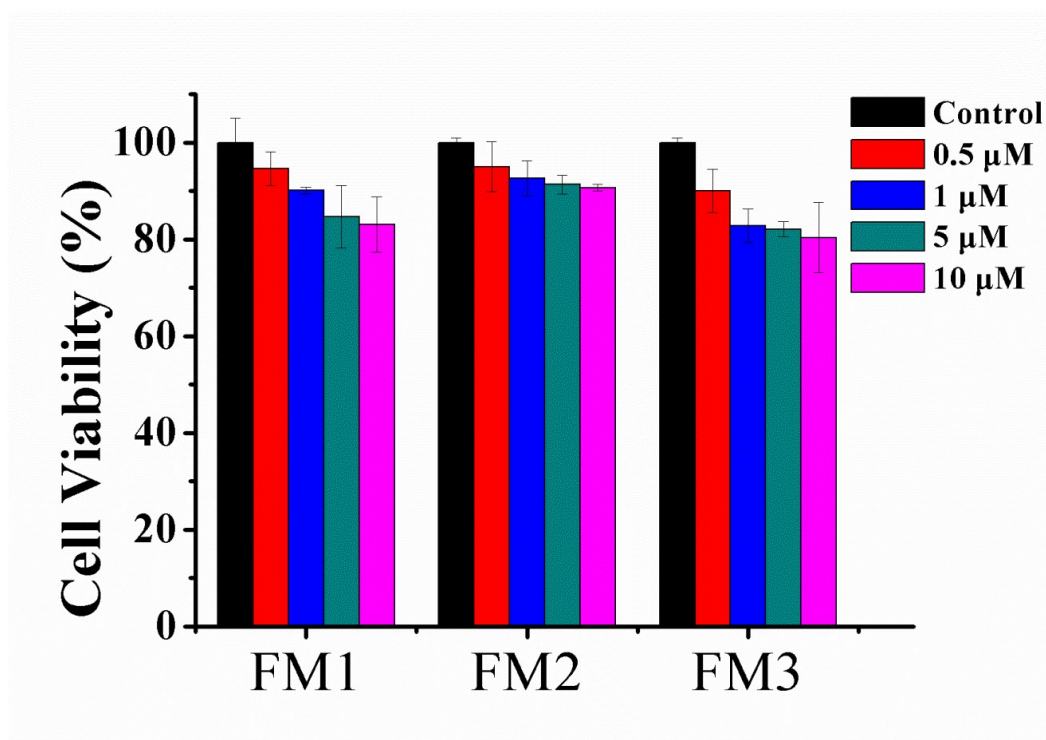

Fig. S10. Cell viability of compounds **FM1**, **FM2**, and **FM3** at different concentrations for 24 h.

## 6. NMR and HRMS spectra

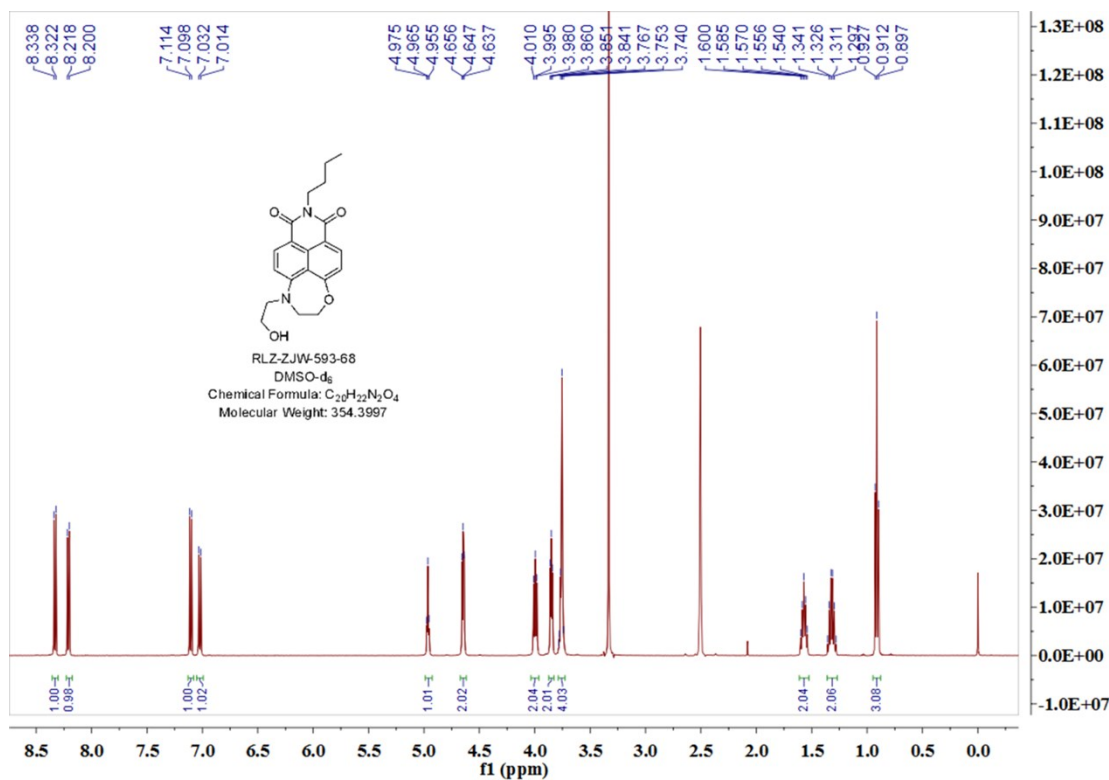

Fig. S11.  $^1\text{H}$  NMR spectrum of FM1 (DMSO- $d_6$ , 400 MHz)

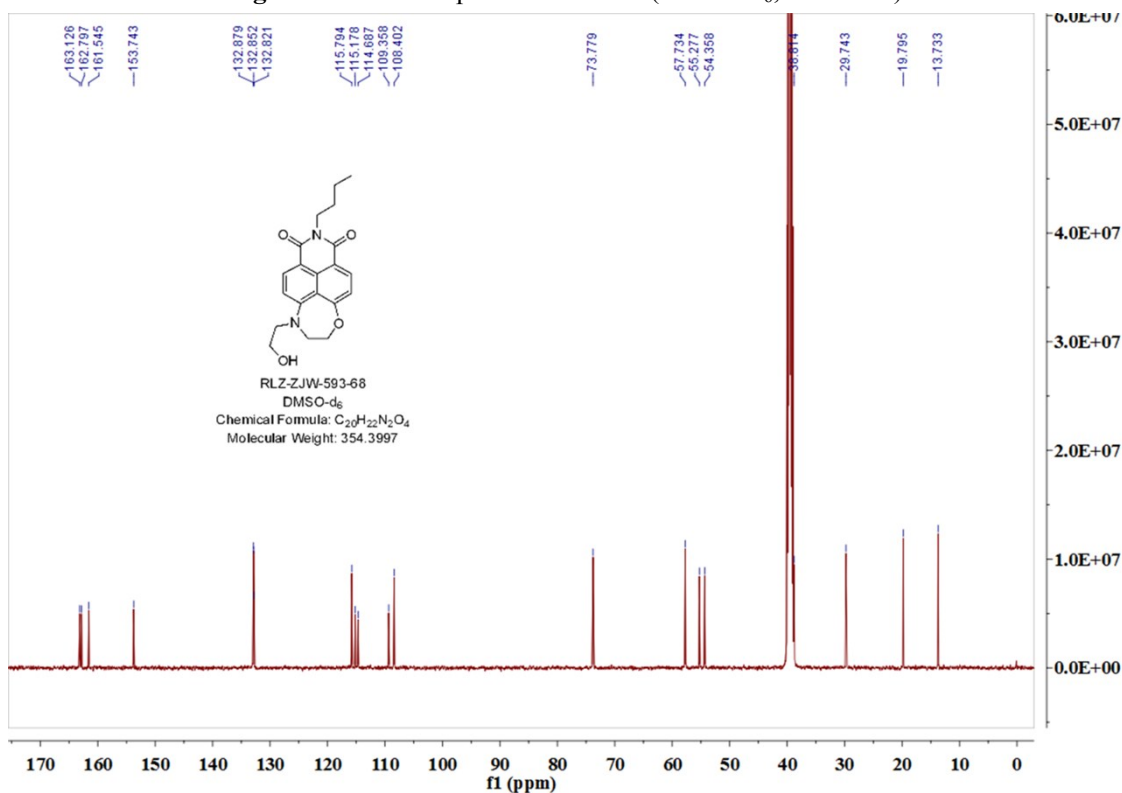

Fig. S12.  $^{13}\text{C}$  NMR spectrum of FM1 (DMSO- $d_6$ , 100 MHz)

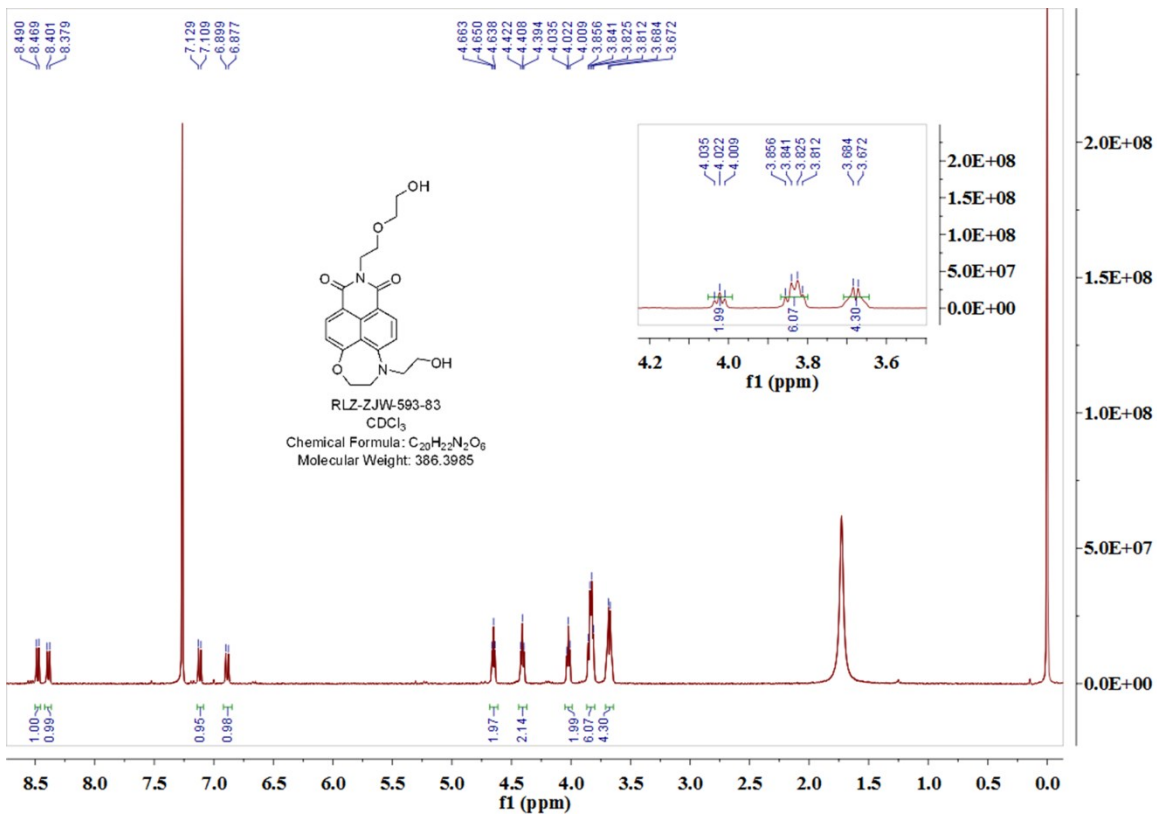

Fig. S13.  $^1H$  NMR spectrum of FM2 ( $CDCl_3$ , 400 MHz)

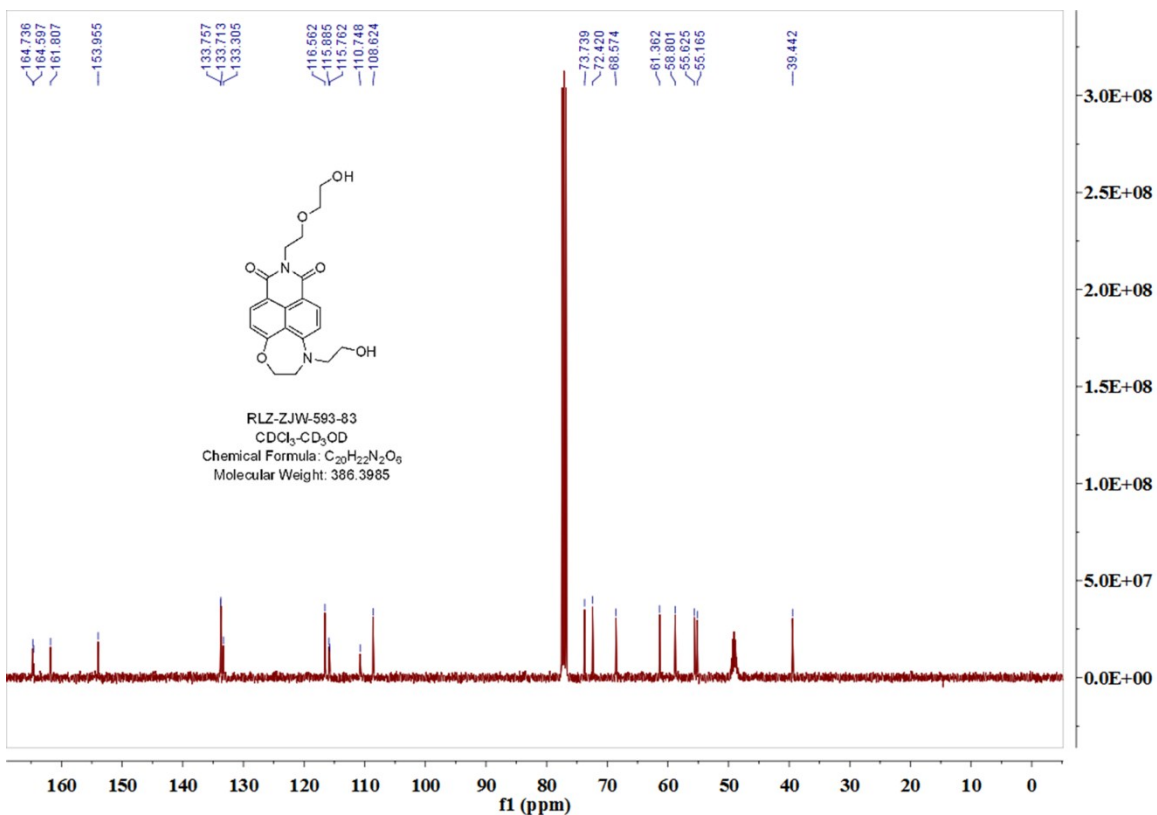

Fig. S14.  $^{13}C$  NMR spectrum of FM2 ( $CDCl_3$ - $CD_3OD$ , 100 MHz)

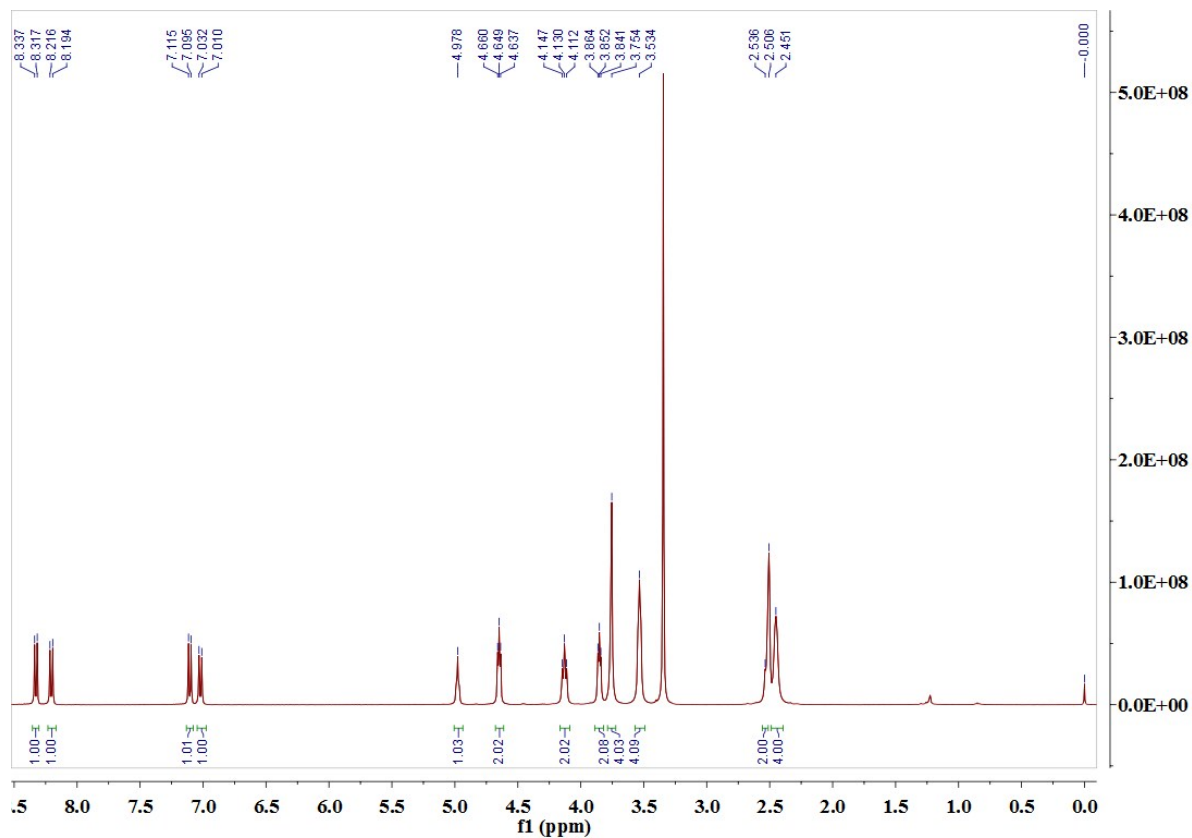

Fig. S15.  $^1\text{H}$  NMR spectrum of FM3 (DMSO- $d_6$ , 400 MHz)

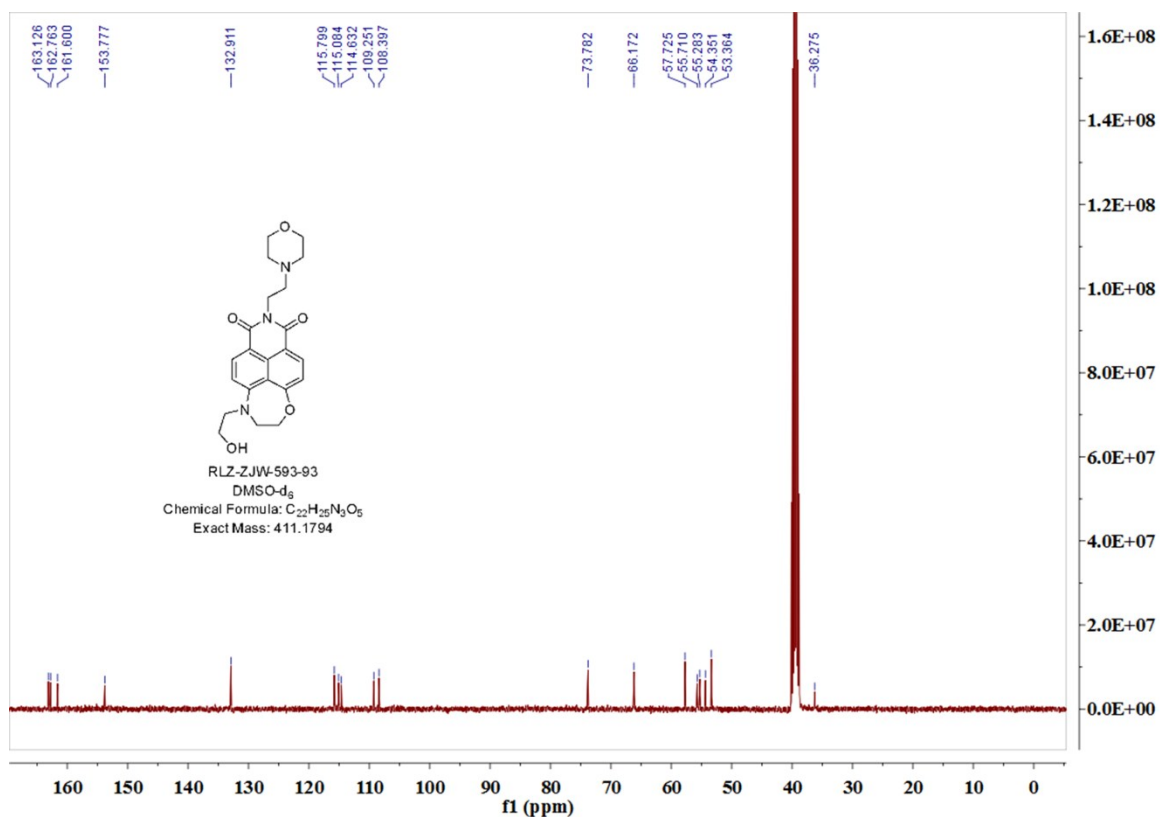

Fig. S16.  $^{13}\text{C}$  NMR spectrum of FM3 (DMSO- $d_6$ , 100 MHz)

### Single Mass Analysis

Tolerance = 50.0 PPM / DBE: min = -1.5, max = 100.0

Element prediction: Off

Number of isotope peaks used for i-FIT = 2

Monoisotopic Mass, Even Electron Ions

11 formula(e) evaluated with 1 results within limits (up to 1 best isotopic matches for each mass)

Elements Used:

C: 0-20 H: 0-23 N: 0-2 O: 0-4

WP-ZHU

ECUST institute of Fine Chem

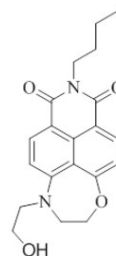

12-Apr-2015  
12:19:40  
1: TOF MS ES+  
4.59e+003

YYS-ZWP-ZJW-593-68 71 (0.529) Cm (66:71)

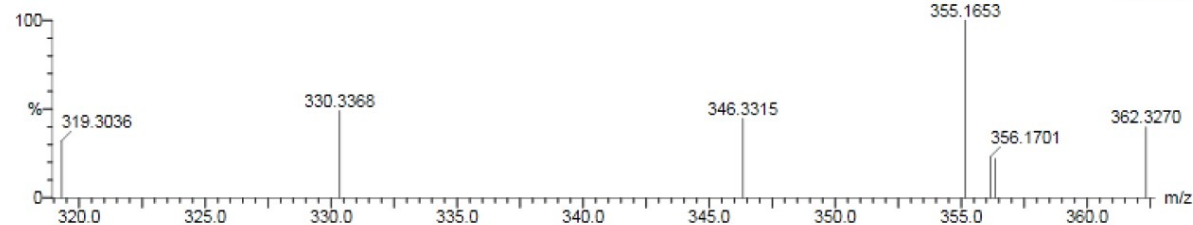

Minimum: 300.0 50.0 -1.5  
Maximum: 100.0

| Mass     | Calc. Mass | mDa  | PPM  | DBE  | i-FIT | i-FIT (Norm) | Formula       |
|----------|------------|------|------|------|-------|--------------|---------------|
| 355.1653 | 355.1658   | -0.5 | -1.4 | 10.5 | 22.2  | 0.0          | C20 H23 N2 O4 |

Fig. S17. ESI HRMS spectrum of FM1

### Single Mass Analysis

Tolerance = 50.0 PPM / DBE: min = -1.5, max = 100.0

Element prediction: Off

Number of isotope peaks used for i-FIT = 2

Monoisotopic Mass, Even Electron Ions

17 formula(e) evaluated with 1 results within limits (up to 1 best isotopic matches for each mass)

Elements Used:

C: 0-20 H: 0-23 N: 0-2 O: 0-6

WP-ZHU

ECUST institute of Fine Chem

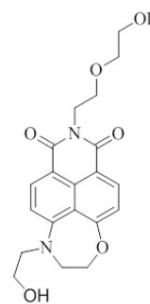

17-May-2015  
19:13:47  
1: TOF MS ES+  
7.42e+002

ZWP-ZJW-59383 278 (1.808) Cm (262:279)

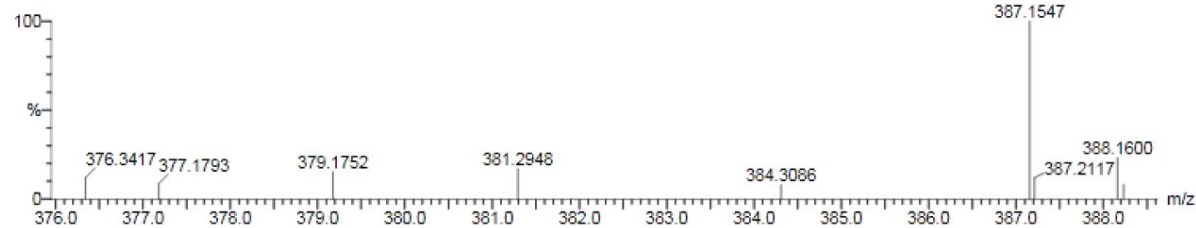

Minimum: 300.0 50.0 -1.5  
Maximum: 100.0

| Mass     | Calc. Mass | mDa  | PPM  | DBE  | i-FIT | i-FIT (Norm) | Formula       |
|----------|------------|------|------|------|-------|--------------|---------------|
| 387.1547 | 387.1556   | -0.9 | -2.3 | 10.5 | 24.2  | 0.0          | C20 H23 N2 O6 |

Fig. S18. ESI HRMS spectrum of FM2

### Single Mass Analysis

Tolerance = 50.0 PPM / DBE: min = -1.5, max = 100.0

Element prediction: Off

Number of isotope peaks used for i-FIT = 2

Monoisotopic Mass, Even Electron Ions

19 formula(e) evaluated with 1 results within limits (up to 1 closest results for each mass)

Elements Used:

C: 0-22 H: 0-26 N: 0-3 O: 0-5

WP-ZHU

ECUST institute of Fine Chem

ZWP-RLZ-ZJW-593-93 203 (1.347) Cm (200:204)

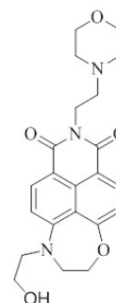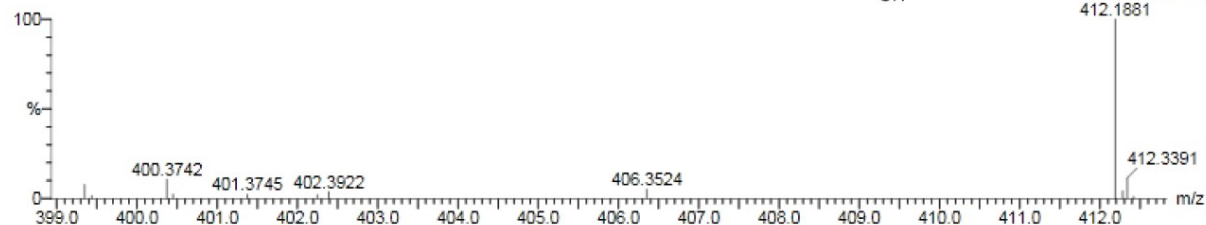

Minimum: -1.5  
Maximum: 300.0 50.0 100.0

| Mass     | Calc. Mass | mDa | PPM | DBE  | i-FIT | i-FIT (Norm) | Formula       |
|----------|------------|-----|-----|------|-------|--------------|---------------|
| 412.1881 | 412.1872   | 0.9 | 2.2 | 11.5 | 54.7  | 0.0          | C22 H26 N3 O5 |

**Fig. S19.** ESI HRMS spectrum of FM3

## 7. References

- S1 Z. Xu, X. Qian and J. Cui, *Org. Lett.*, **2005**, 7, 3029-3032.
- S2 S. Zhang, M. Zhao, W. Zhu, Y. Xu and X. Qian, *Dalton Trans.*, **2015**, 44, 9740-9743.
- S3 J. Q. Umberger and V. K. LaMer, *J. Am. Chem. Soc.*, **1945**, 67, 1099-1109.
- S4 A. T. R. Williams, S. A. Winfield and J. N. Miller, *Analyst*, **1983**, 108, 1067-1071.
- S5 J. Gao, P. Wang and R. W. Giese, *Anal. Chem.*, **2002**, 74, 6397-6401.
- S6 C. Xu and W. W. Webb, *J. Opt. Soc. Am. B*, **1996**, 13, 481-491.
